# Supplementary material for: The Talin Head Domain Reinforces Integrin-Mediated Adhesion by Promoting Adhesion Complex Stability and Clustering
Source: PubMed Central journal article supplement (PMC4230843; doi:10.1371/journal.pgen.1004756), 2014-11-13

*mys*<sup>XG43</sup> +  
*pUbi-integrin YFP\*D807R*

*mys*<sup>XG43</sup> +  
*pUbi-integrin YFP\*G792N*

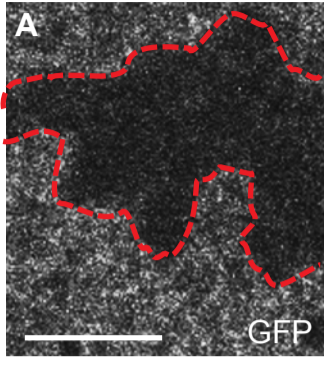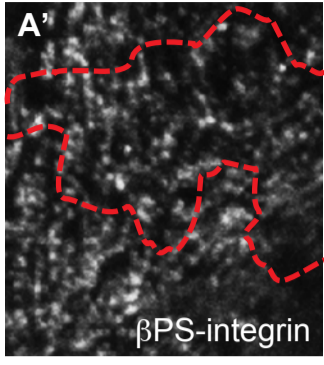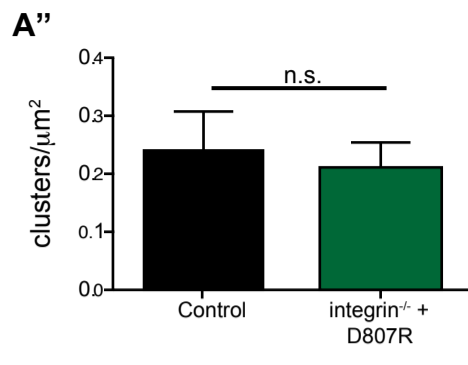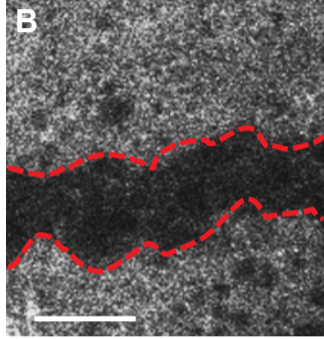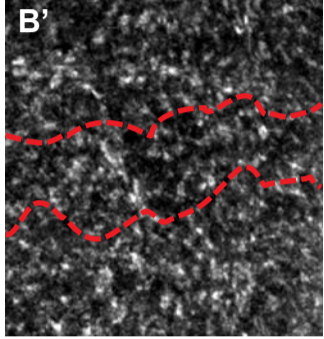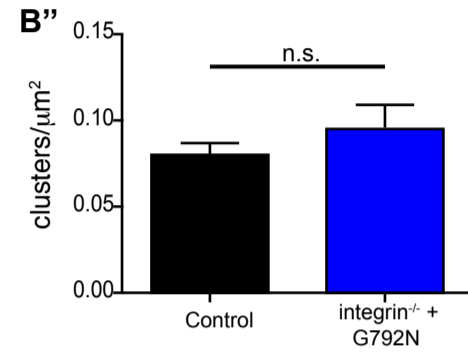

Supplement: pgen.1004756.s004.pdf [file pgen.1004756.s004.pdf]
